# Supplementary figures and images for: Catalyst-free synthesis of novel dimeric β-carboline derivatives via an unexpected [2 + 2 + 2] annulation
Source: Royal Society of Chemistry journal article supplement (doi:10.1039/c7ob00689f), 2017-01-01

### NMR Spectra:

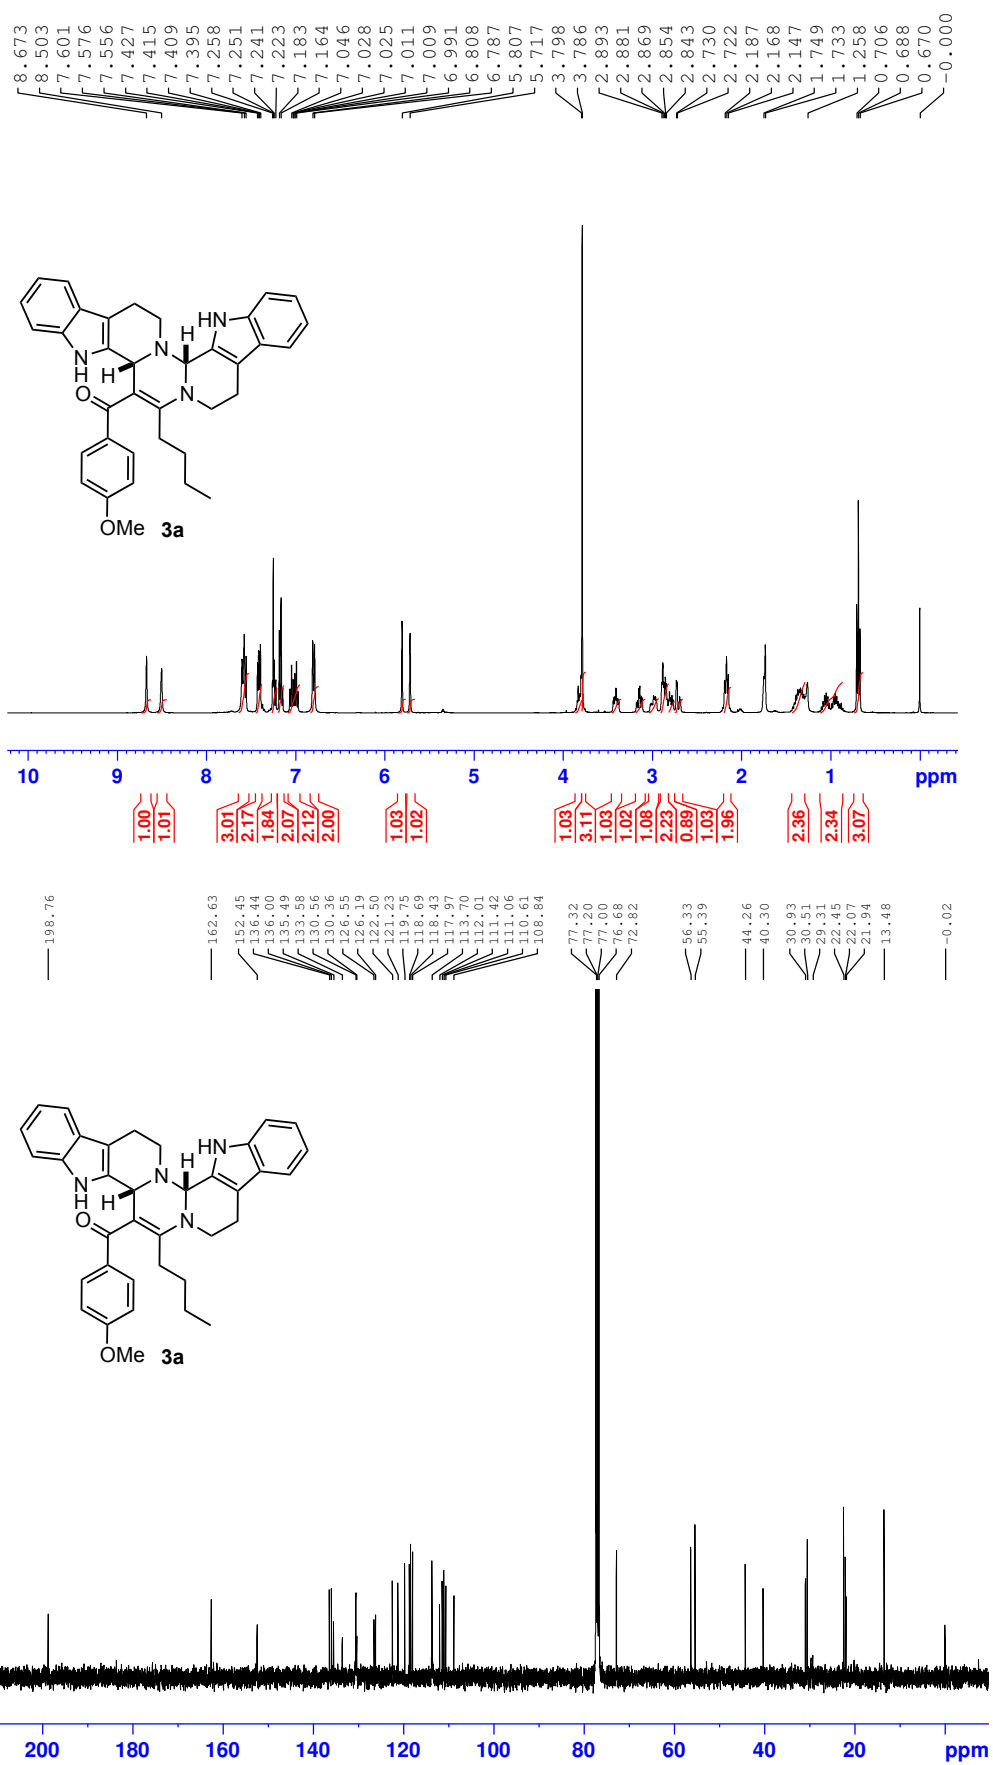

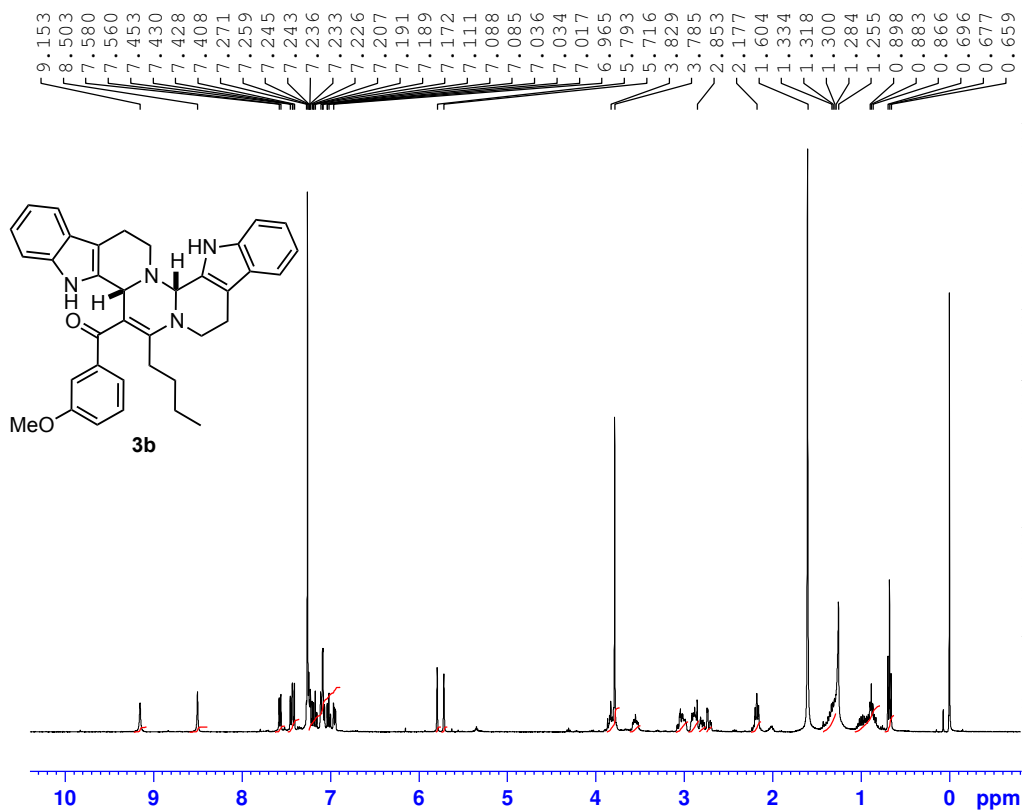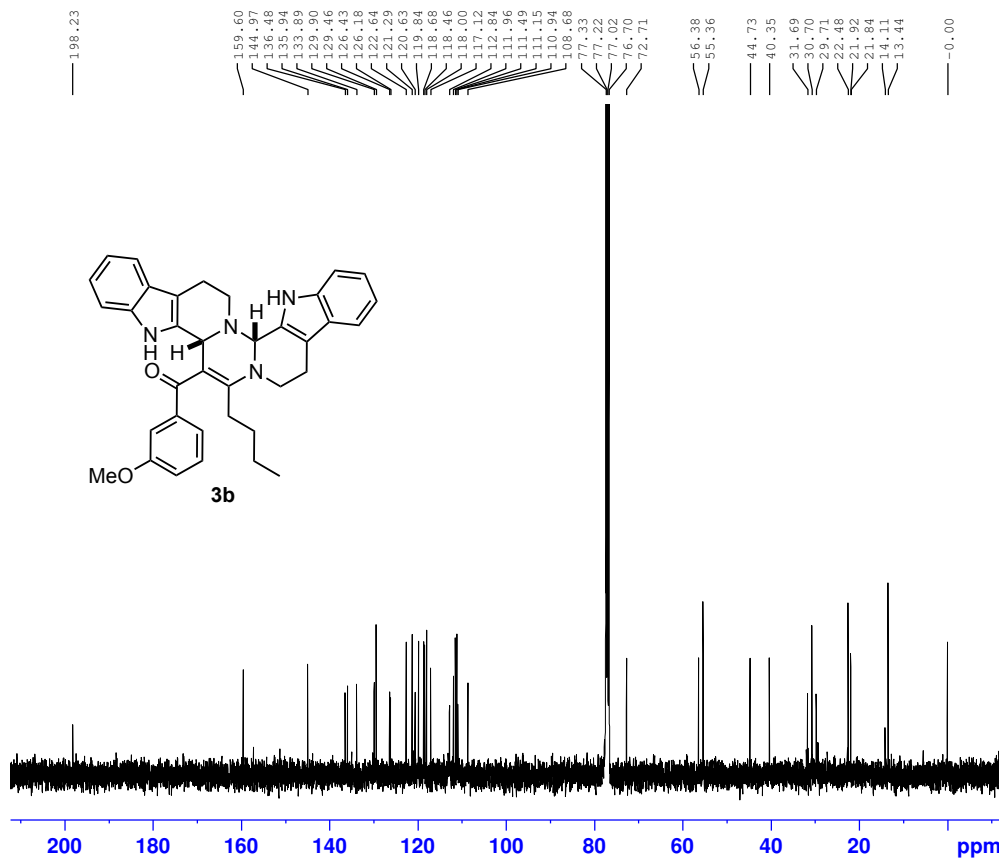

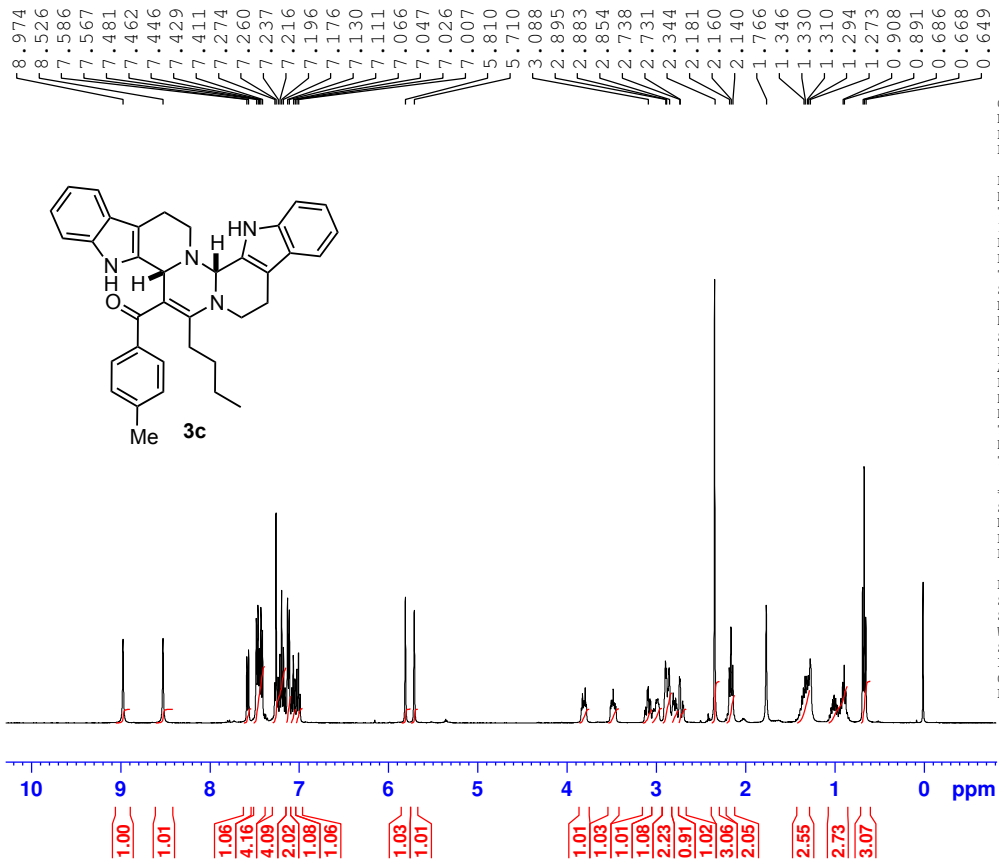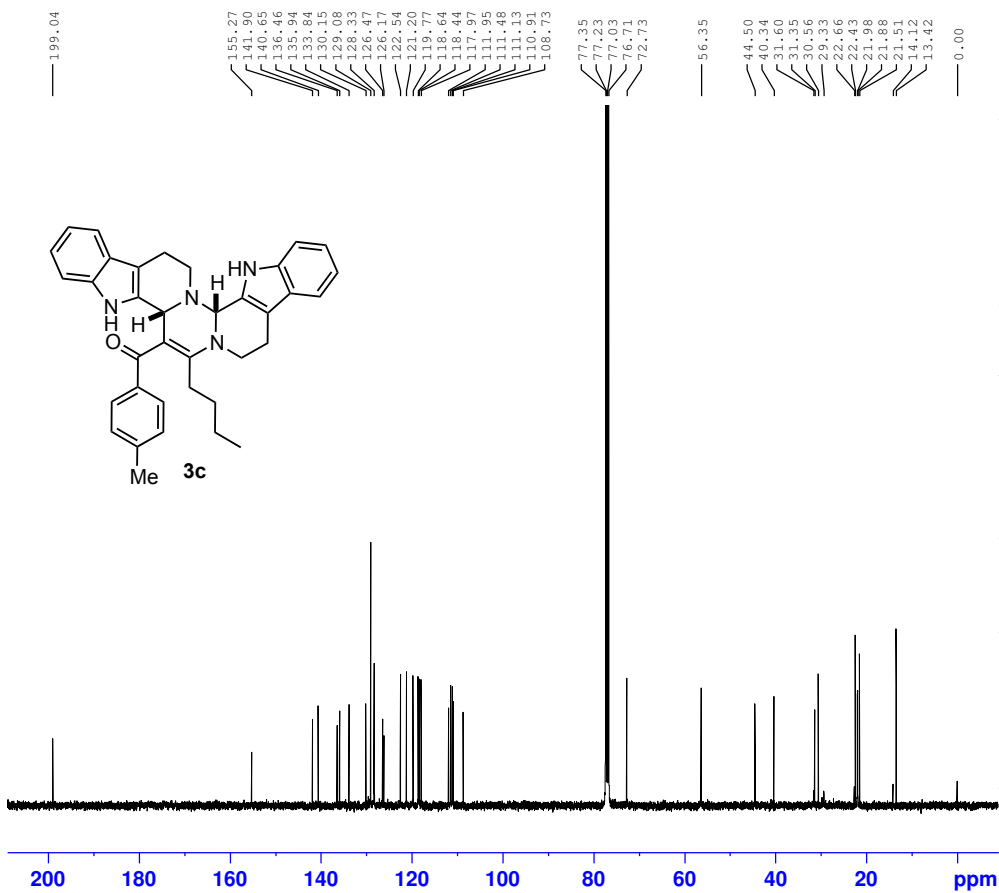

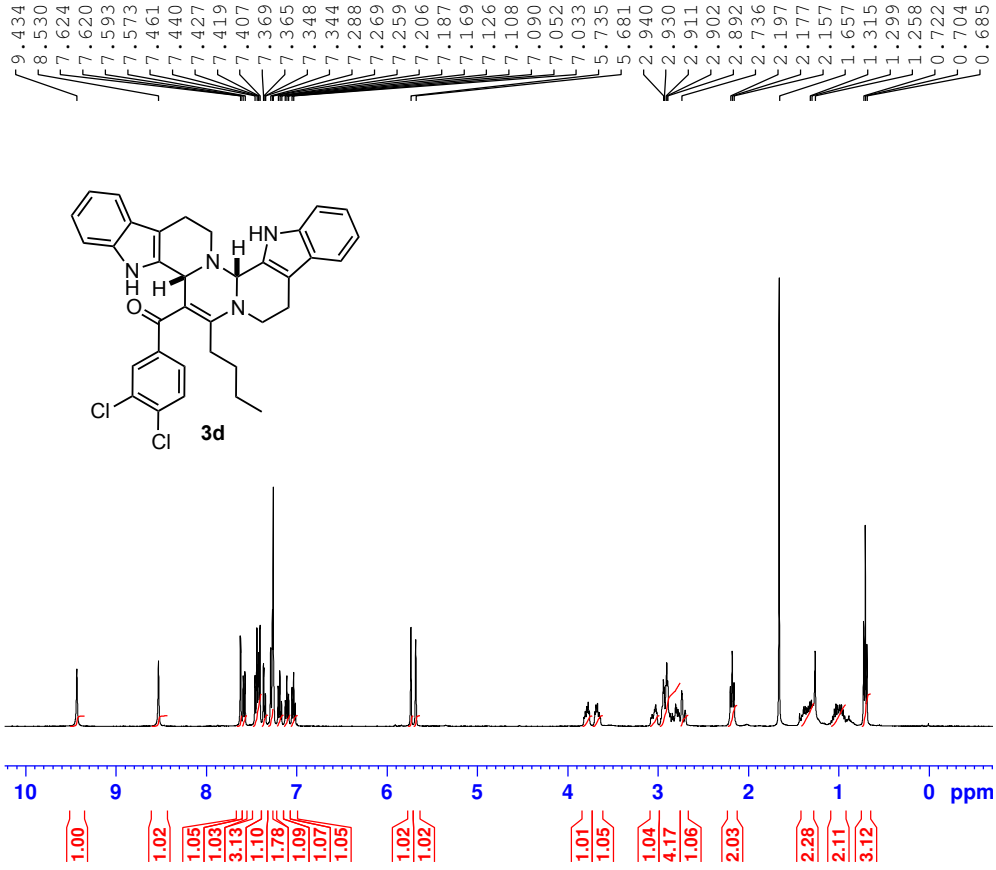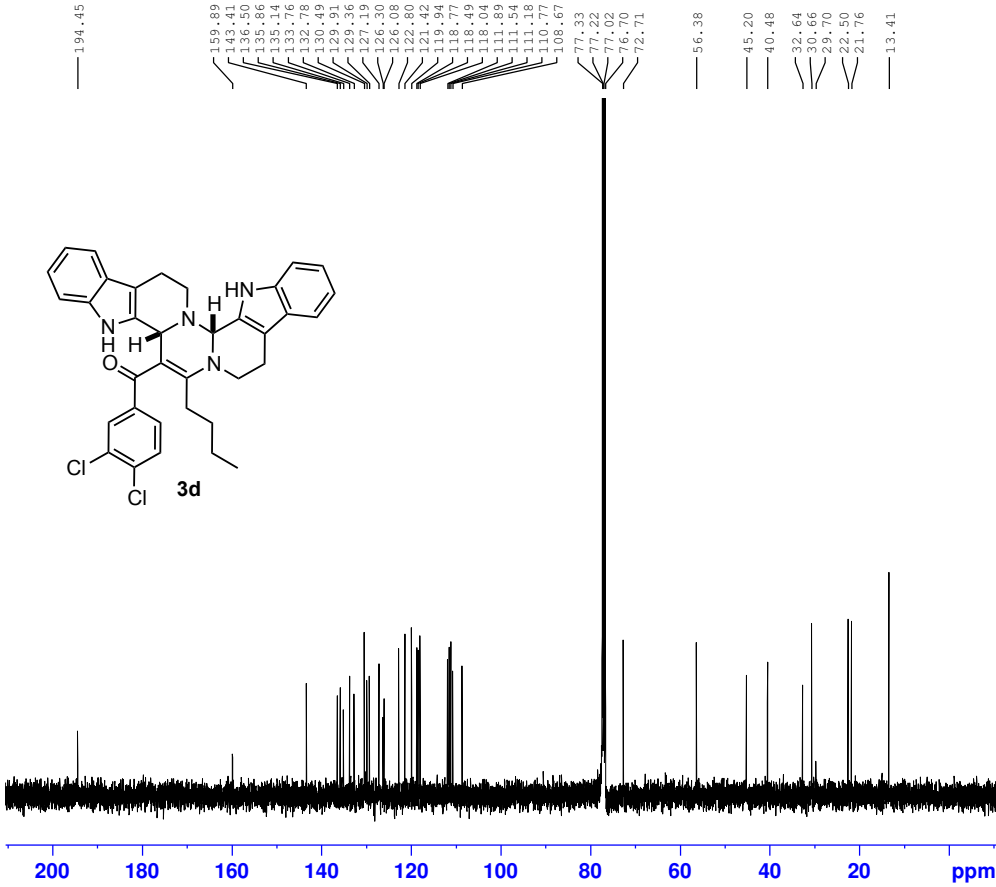

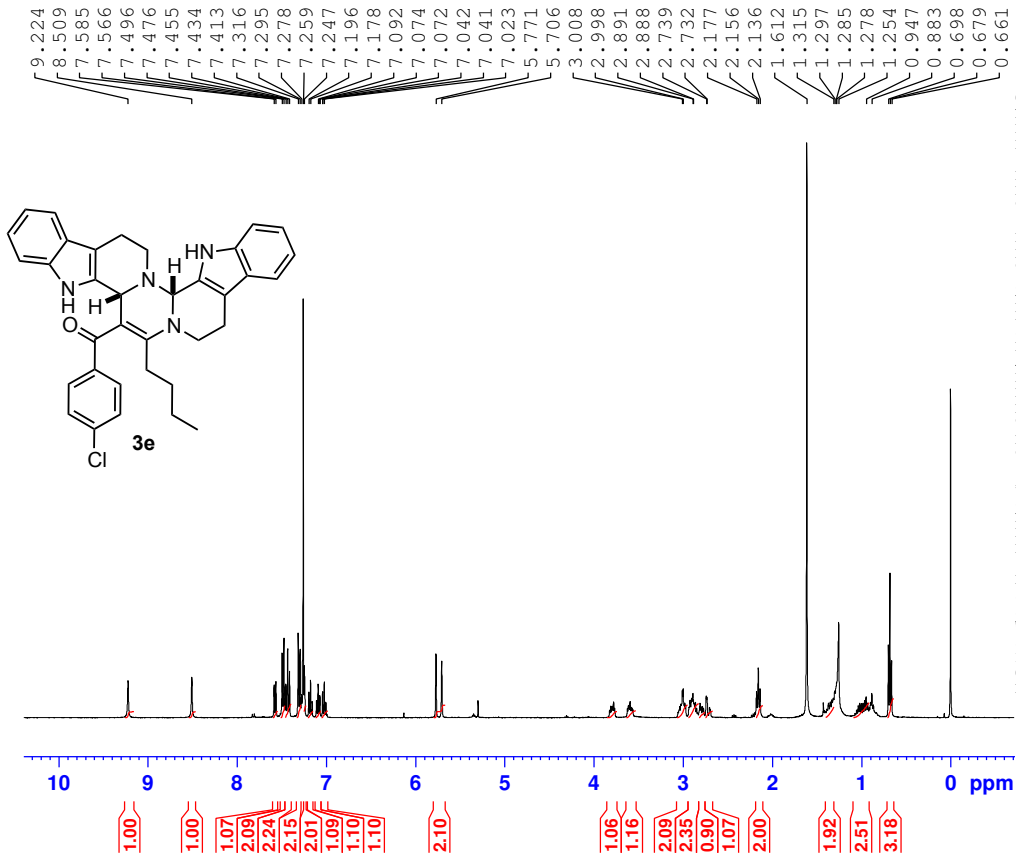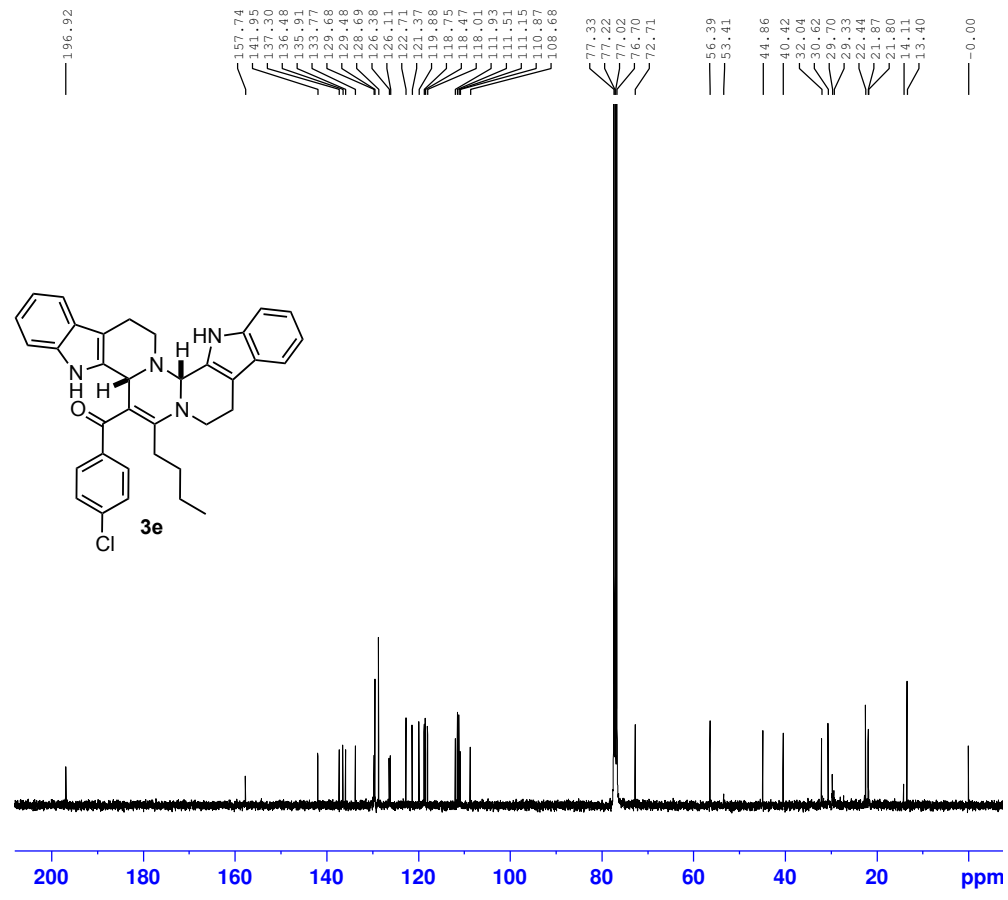

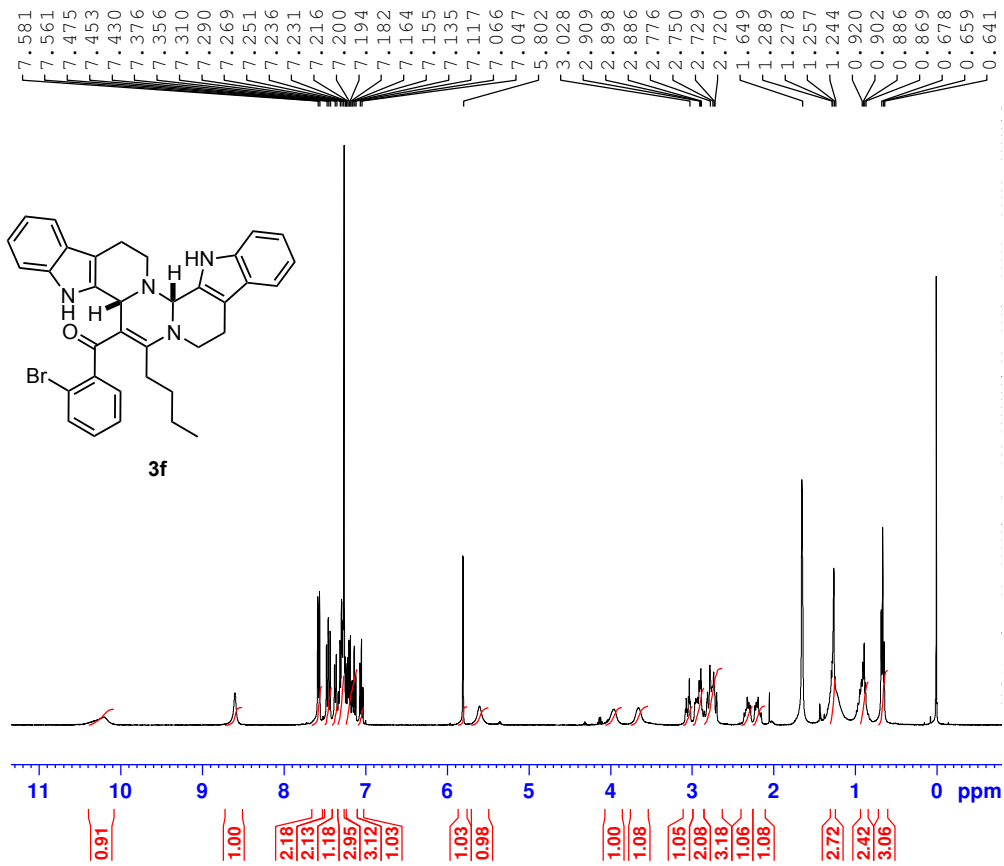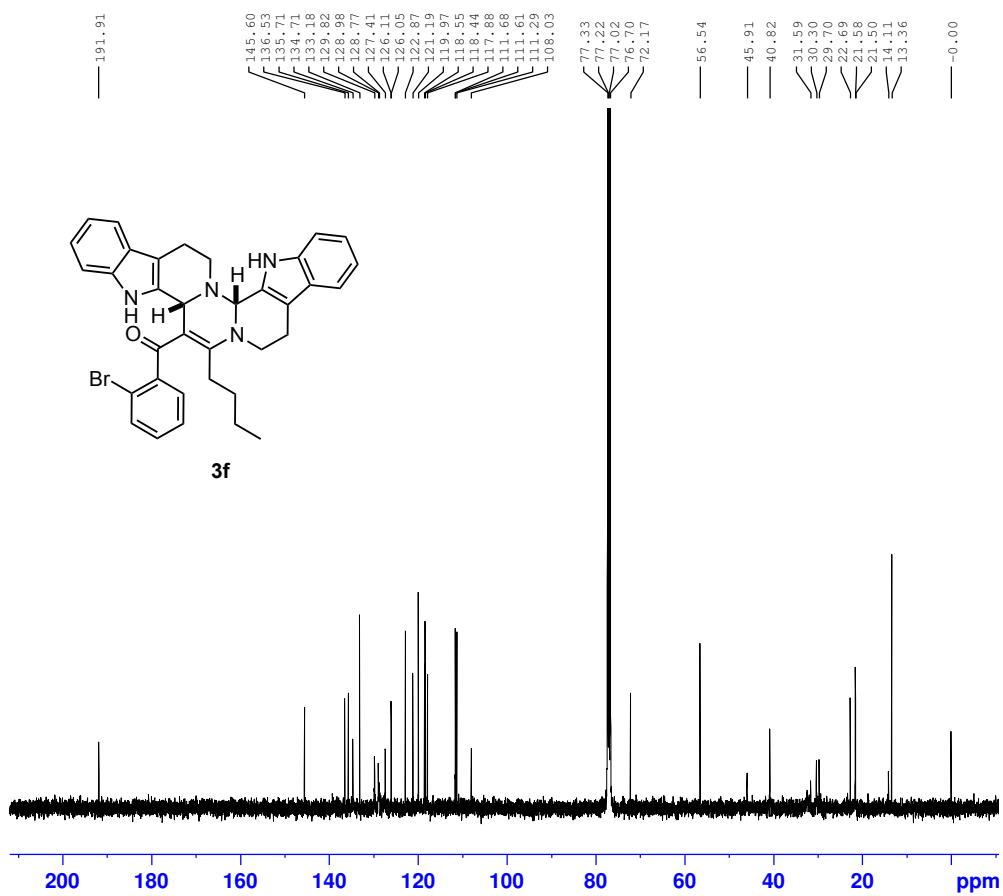

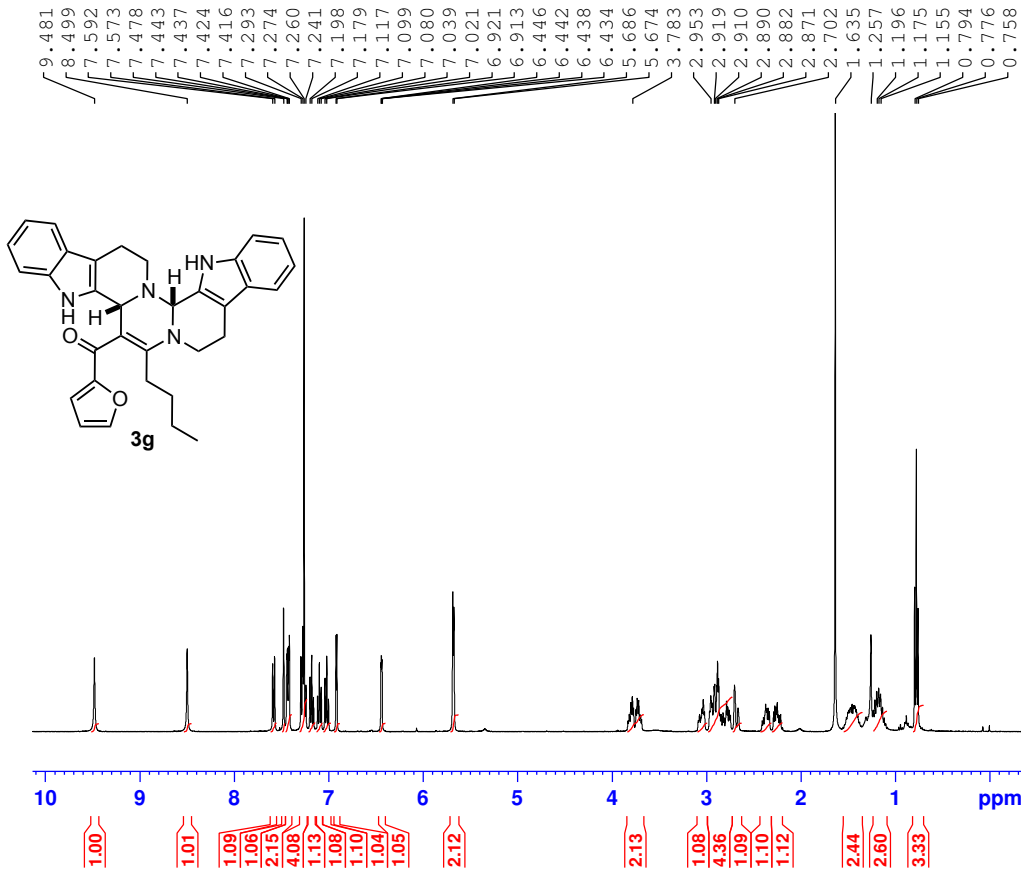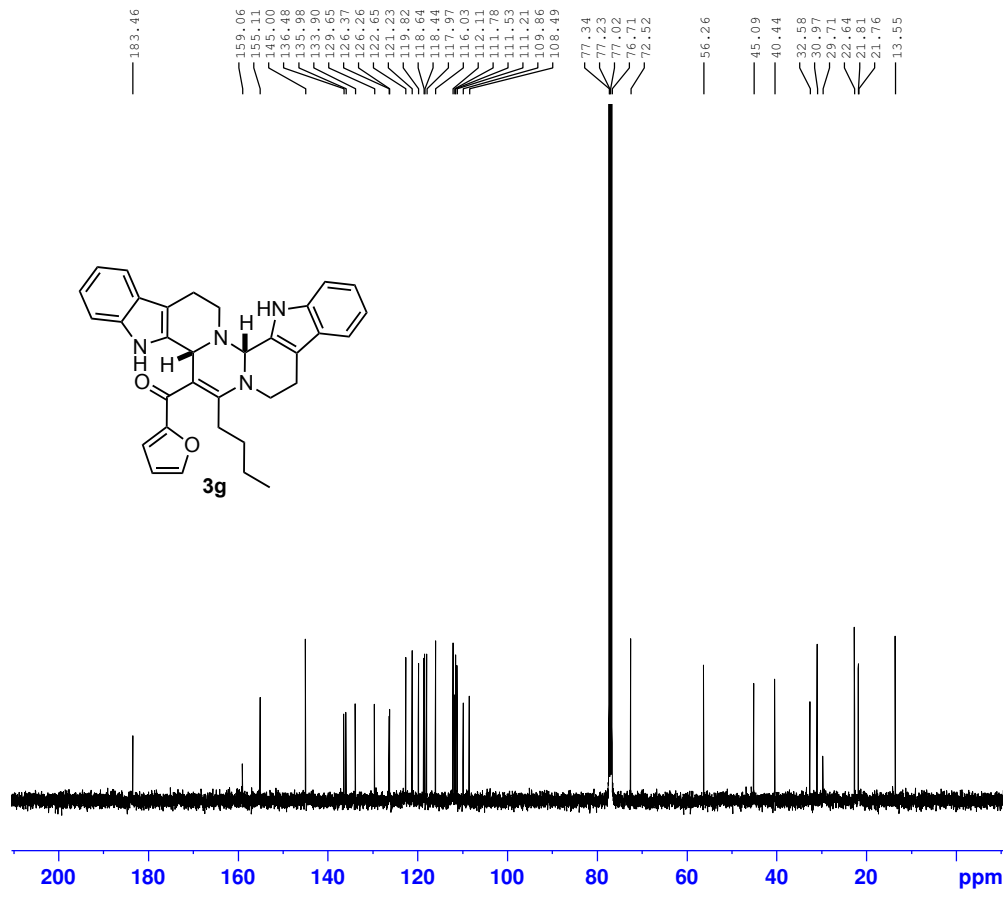

10.165  
8.637  
7.583  
7.563  
7.441  
7.422  
7.350  
7.330  
7.259  
7.193  
7.174  
7.113  
7.043  
7.025  
5.509  
5.374  
2.854  
2.744  
2.730  
2.719  
2.710  
2.692  
2.668  
1.731  
1.630  
1.613  
1.596  
1.579  
1.561  
1.477  
1.458  
1.440  
1.421  
1.267  
0.993  
0.975  
0.957  
0.892  
0.874  
0.855  
0.821  
0.802  
0.784  
0.003

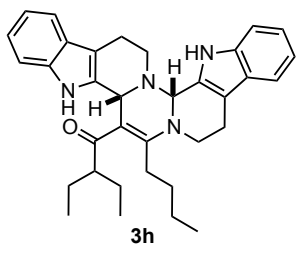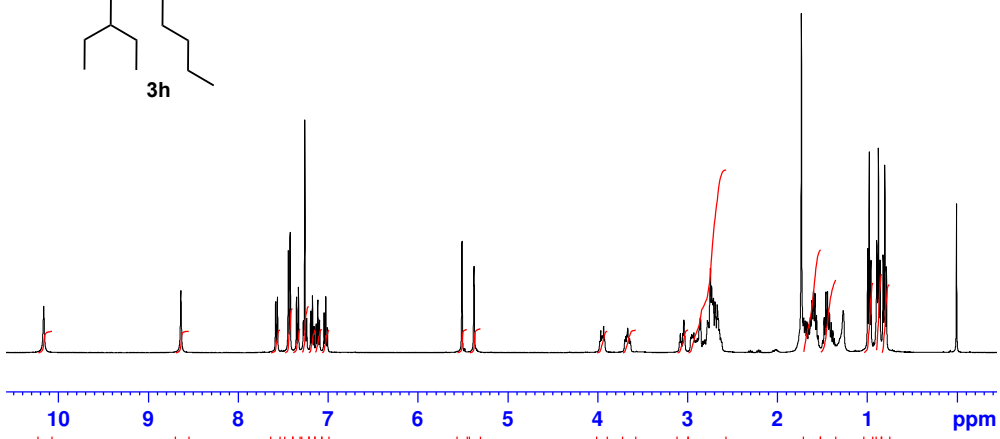

204.61  
161.80  
136.46  
135.64  
134.75  
129.75  
126.21  
126.14  
122.69  
121.08  
119.85  
118.47  
118.39  
117.91  
115.73  
111.63  
111.54  
111.13  
108.02  
77.34  
77.22  
77.02  
76.70  
72.01  
56.68  
53.21  
45.67  
40.98  
33.49  
31.59  
31.05  
29.33  
26.28  
26.14  
22.82  
21.73  
21.58  
14.12  
13.80  
12.56  
12.08  
-0.00

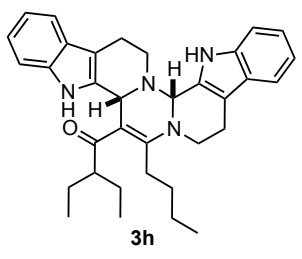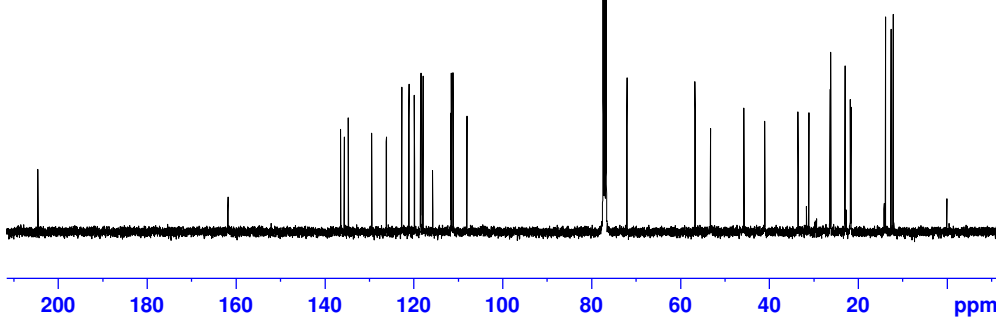



8.681  
8.454  
7.598  
7.579  
7.560  
7.437  
7.420  
7.400  
7.260  
7.247  
7.228  
7.203  
7.184  
7.167  
7.056  
7.017  
6.999  
6.814  
6.794  
5.811  
5.736  
3.792  
2.899  
2.888  
2.859  
2.740  
2.733  
2.182  
2.163  
2.142  
1.633  
1.286  
1.255  
1.150  
1.133  
1.115  
1.026  
1.019  
1.005  
0.882  
0.804  
0.787  
0.768  
0.001

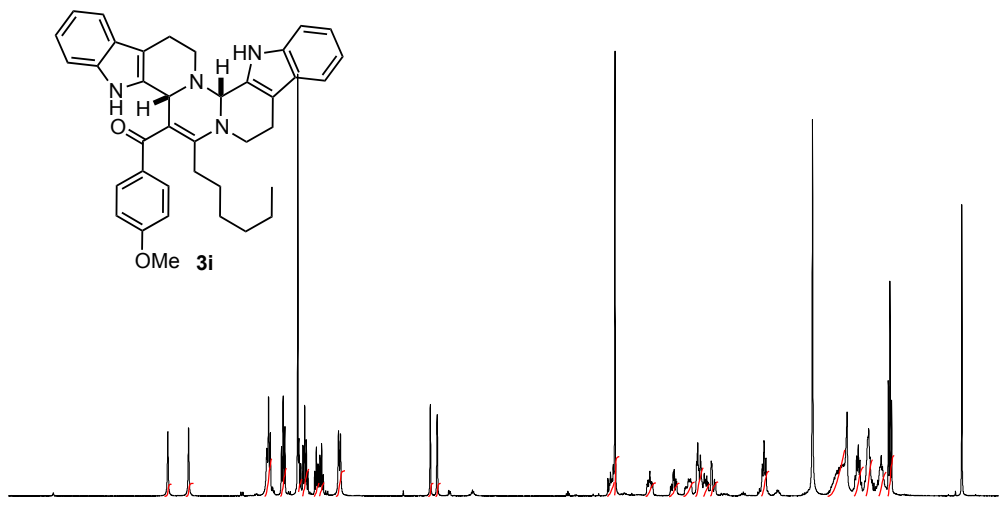

10 9 8 7 6 5 4 3 2 1 ppm

1.00  
1.06  
3.04  
2.25  
1.37  
2.23  
1.13  
1.13  
2.06  
1.05  
1.04  
1.17  
3.21  
1.08  
1.07  
1.15  
2.33  
1.00  
1.17  
2.03  
3.91  
2.37  
3.02  
1.99  
3.28

198.79  
162.58  
152.63  
136.42  
135.98  
135.54  
133.60  
130.32  
130.32  
126.54  
126.18  
122.49  
121.23  
119.75  
118.68  
118.44  
117.98  
113.69  
112.01  
111.43  
111.08  
110.55  
108.80  
77.53  
77.22  
77.01  
76.83  
56.28  
55.36  
44.30  
40.31  
31.23  
31.20  
29.70  
29.33  
28.99  
28.34  
27.22  
27.41  
22.07  
21.93  
13.94  
-0.00

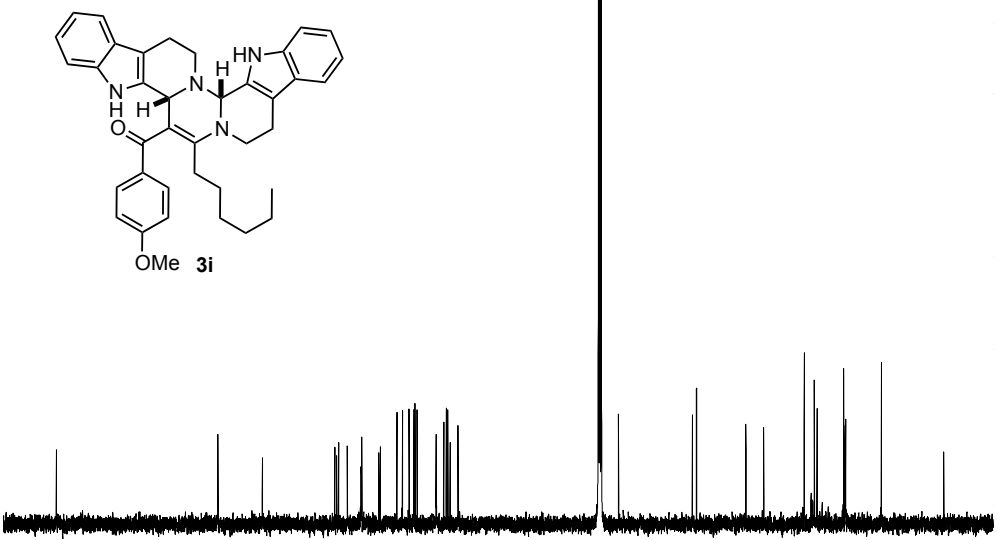

200 180 160 140 120 100 80 60 40 20 ppm

8.539  
8.439  
7.601  
7.581  
7.313  
7.291  
7.259  
7.066  
7.044  
7.012  
7.007  
6.919  
6.913  
6.897  
6.891  
6.861  
6.856  
6.814  
6.793  
6.719  
6.713  
6.697  
6.691  
5.782  
5.687  
3.892  
3.804  
3.794  
2.844  
2.804  
2.681  
2.674  
2.181  
2.161  
2.141  
1.770  
1.333  
1.317  
1.295  
1.266  
0.707  
0.689  
0.671  
0.003

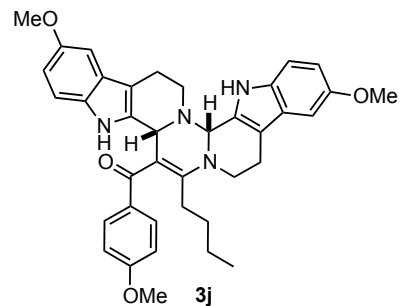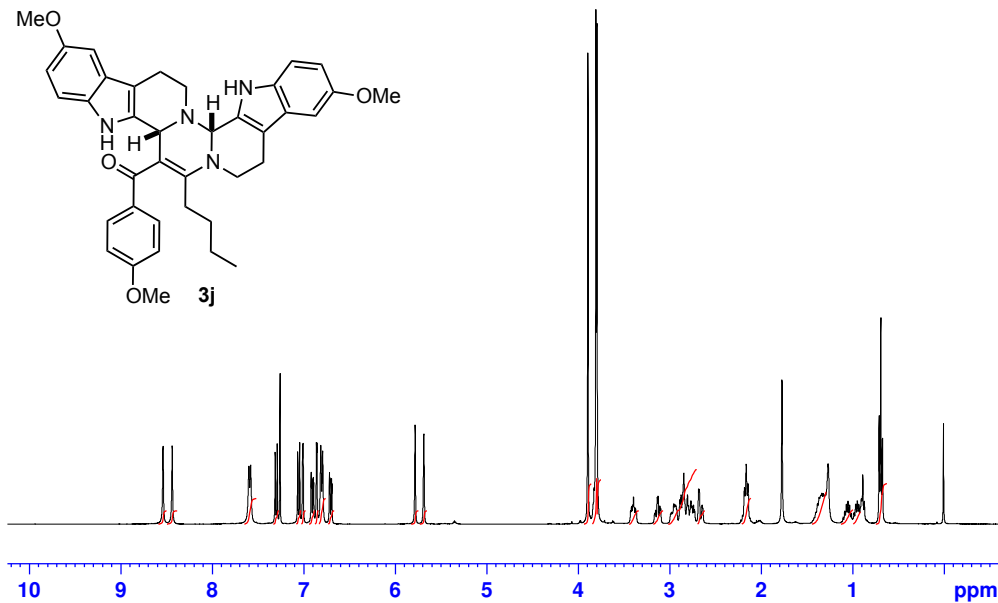

198.75  
162.59  
154.27  
153.56  
152.51  
152.51  
135.49  
134.40  
131.55  
131.21  
131.15  
130.54  
126.88  
126.46  
113.68  
112.34  
112.13  
111.72  
111.05  
110.56  
108.58  
100.67  
100.24  
77.34  
77.02  
76.70  
72.84  
56.32  
56.04  
55.89  
55.40  
44.27  
40.30  
31.59  
30.93  
30.51  
22.66  
22.46  
22.10  
21.95  
14.12  
13.50  
-0.00

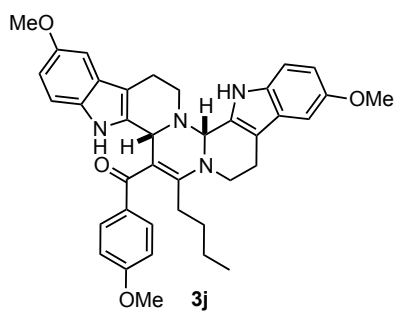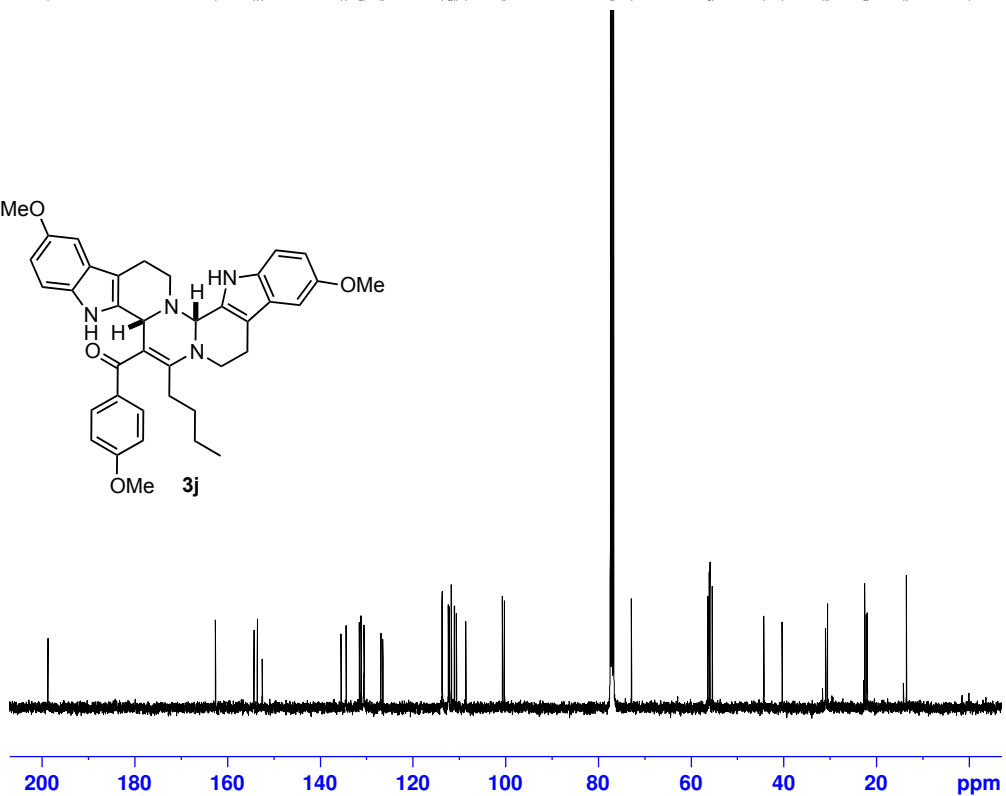

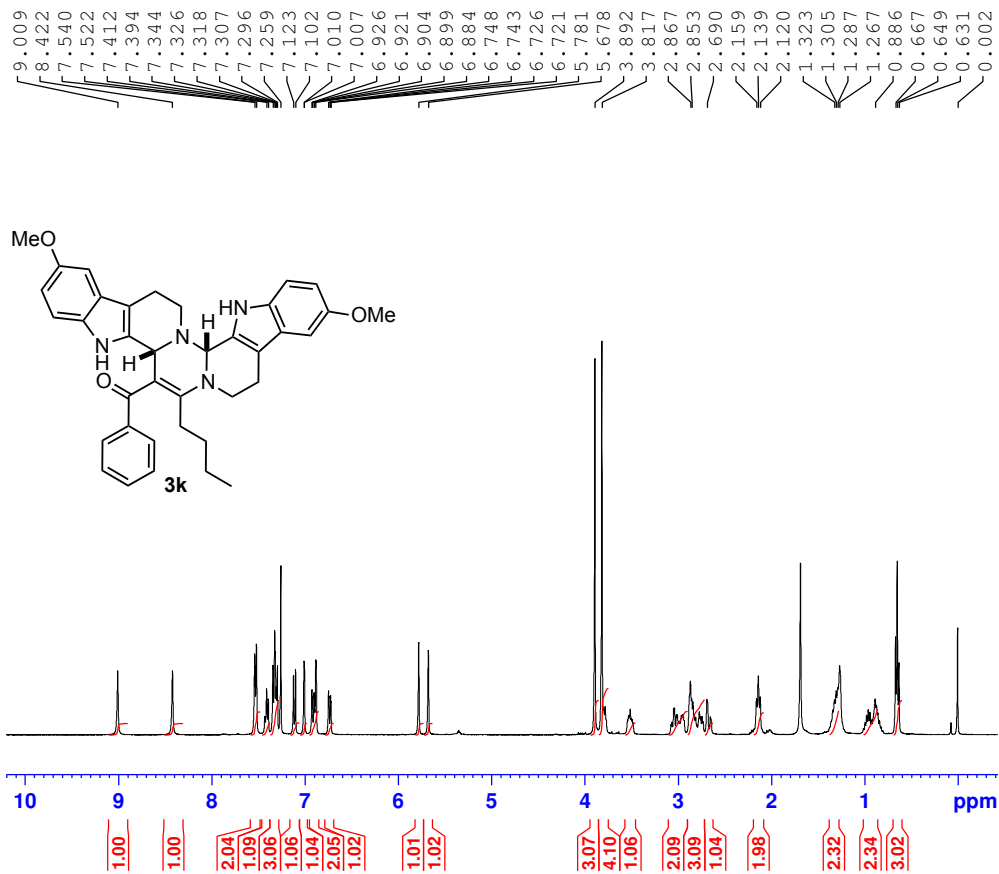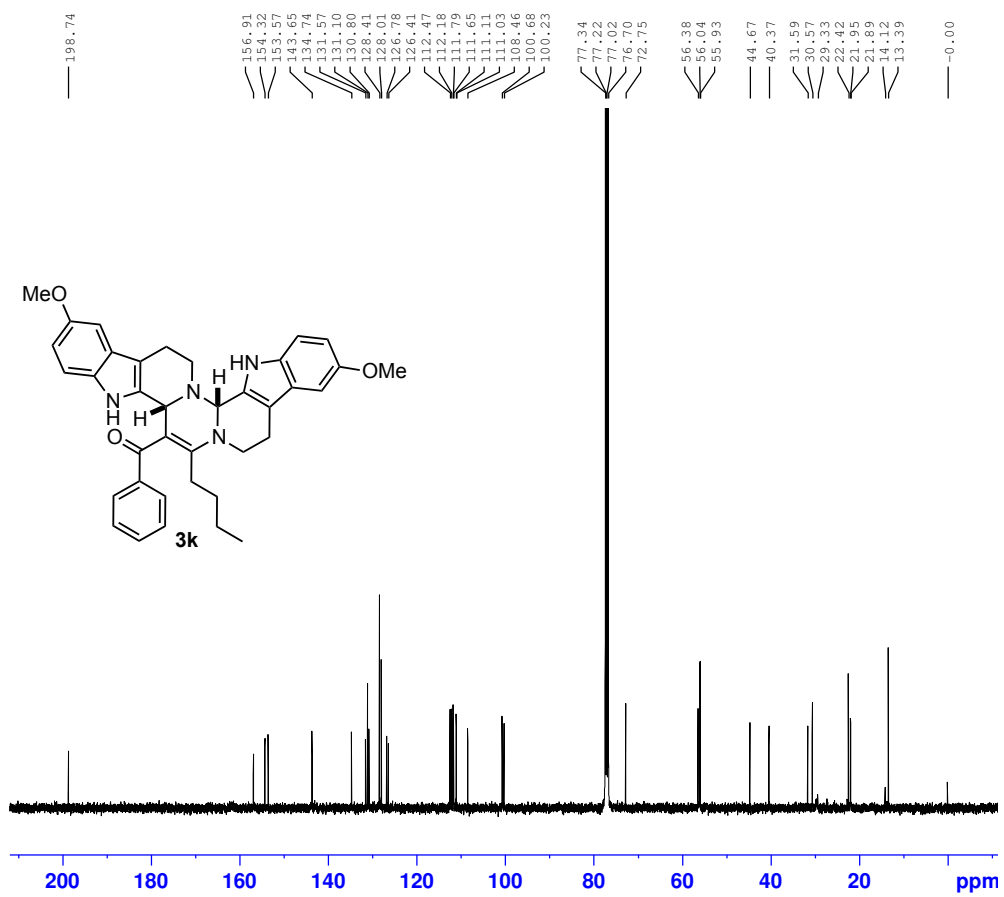

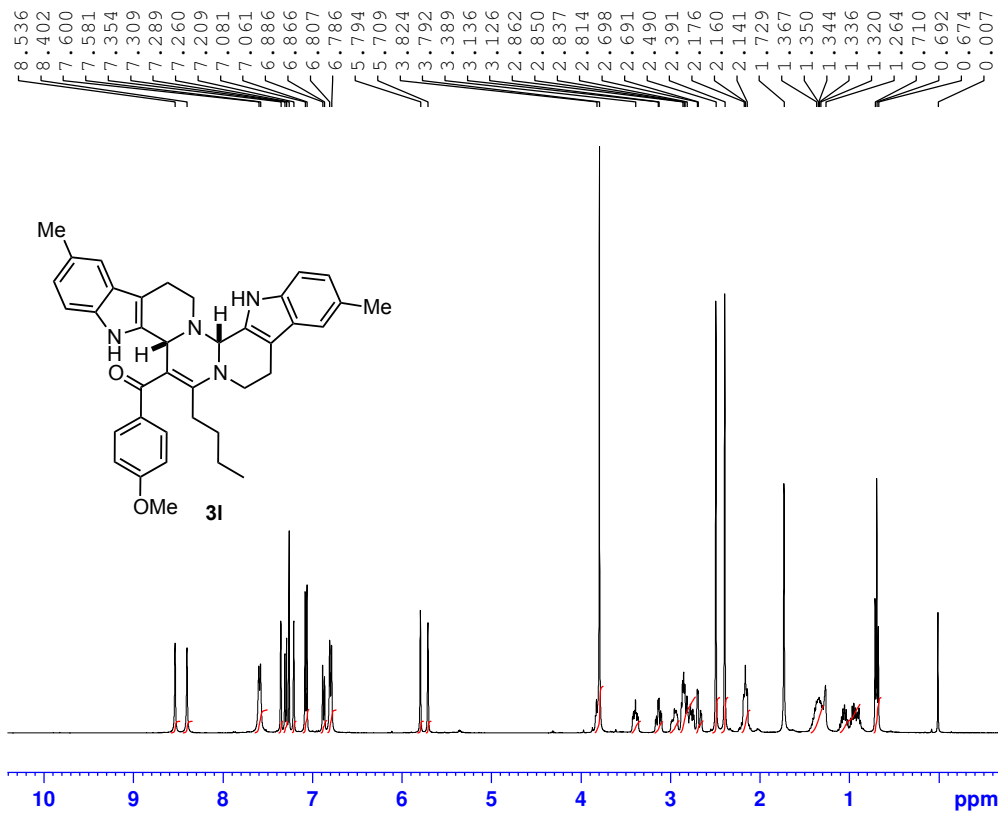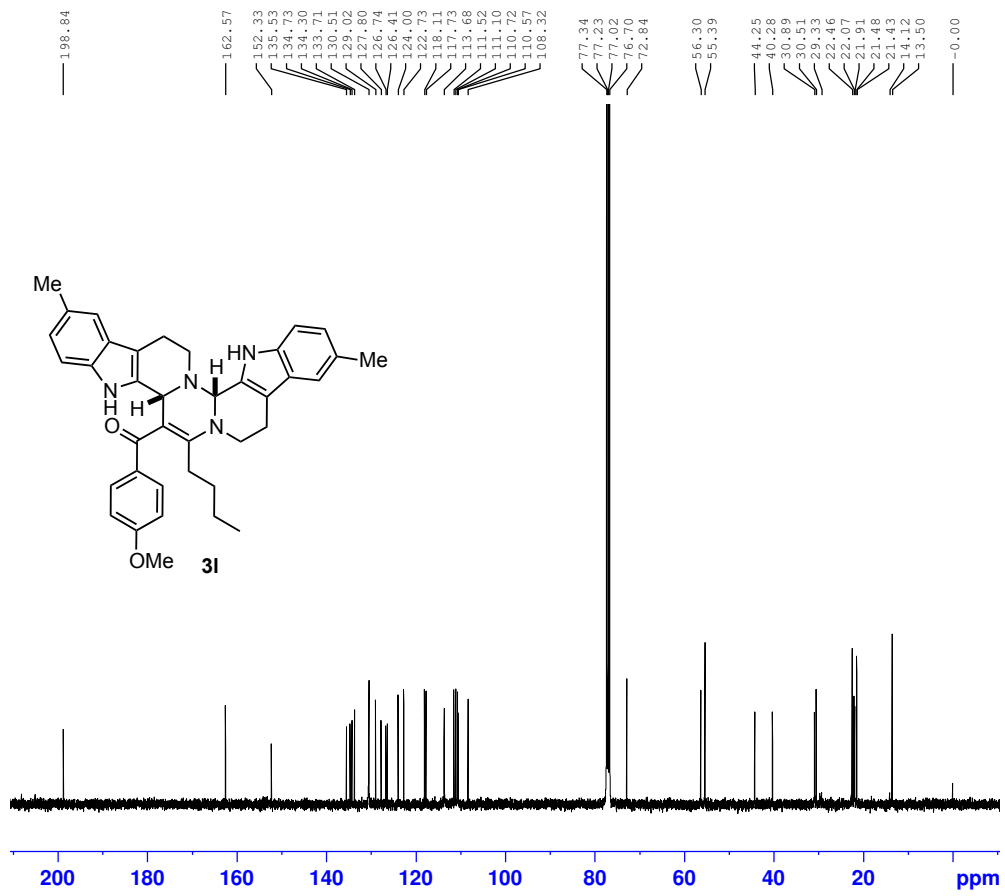

8.755  
8.555  
7.581  
7.561  
7.524  
7.520  
7.358  
7.354  
7.332  
7.311  
7.260  
7.207  
7.202  
7.185  
7.086  
7.065  
7.001  
6.996  
6.819  
6.798  
5.783  
5.685  
3.821  
3.797  
2.851  
2.839  
2.826  
2.811  
2.800  
2.684  
2.677  
2.184  
2.166  
2.145  
1.625  
1.341  
1.325  
1.308  
1.303  
1.286  
0.883  
0.700  
0.681  
0.663

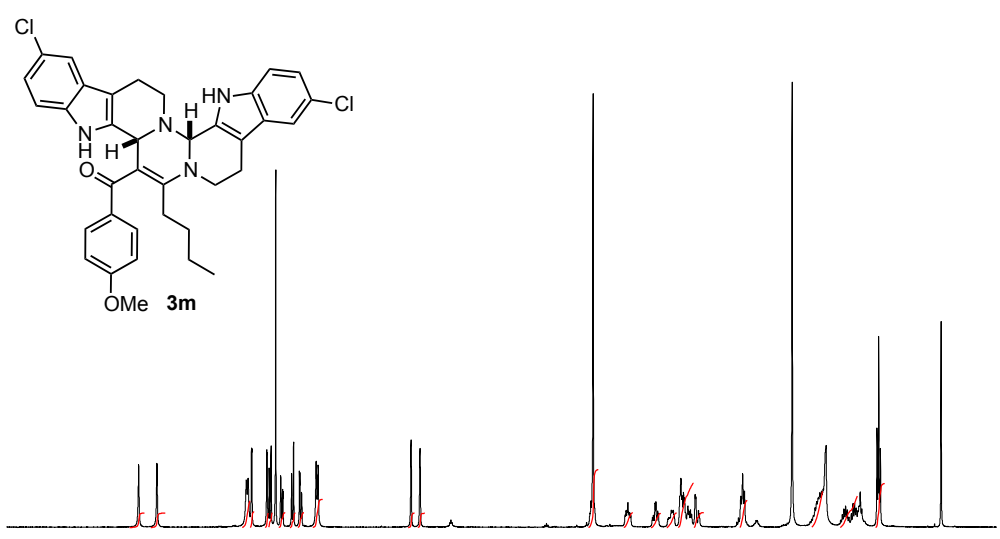

10  
9  
8  
7  
6  
5  
4  
3  
2  
1  
ppm

1.00  
0.99  
1.87  
1.09  
1.01  
1.02  
1.01  
1.00  
1.00  
1.02  
1.95  
0.99  
0.98  
3.99  
1.02  
0.98  
1.01  
3.05  
1.03  
1.88  
2.62  
2.21  
3.03

198.72  
162.72  
152.96  
135.32  
135.02  
134.78  
134.22  
131.65  
130.50  
127.58  
127.18  
125.55  
124.47  
122.79  
121.46  
117.55  
117.55  
113.74  
112.44  
112.02  
111.80  
110.36  
108.52  
77.33  
77.21  
77.01  
76.69  
72.63  
56.23  
55.41  
44.23  
40.28  
31.91  
31.59  
31.03  
29.70  
29.61  
29.32  
27.22  
22.65  
22.43  
21.90  
21.74  
14.11  
13.47  
-0.01

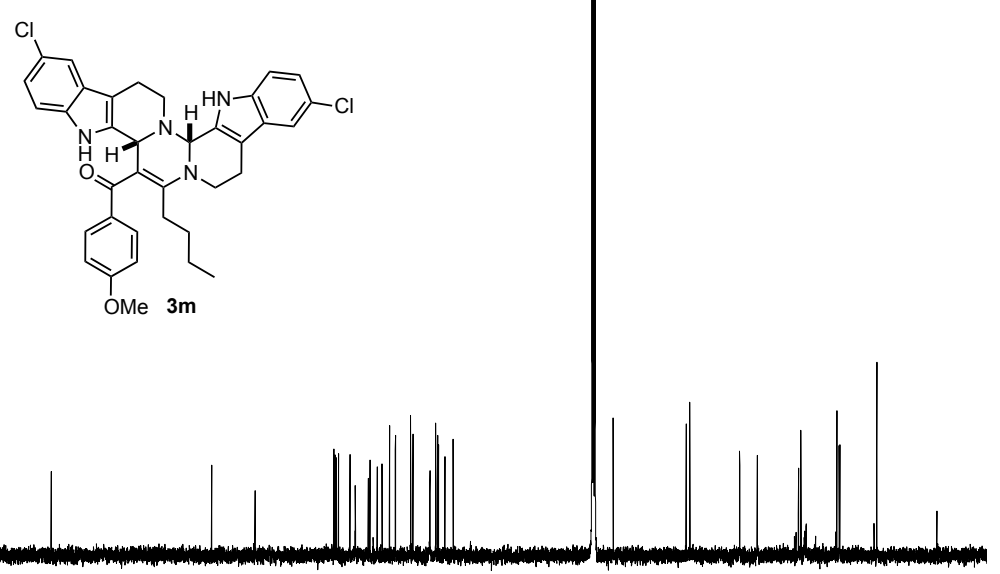

200  
180  
160  
140  
120  
100  
80  
60  
40  
20  
ppm

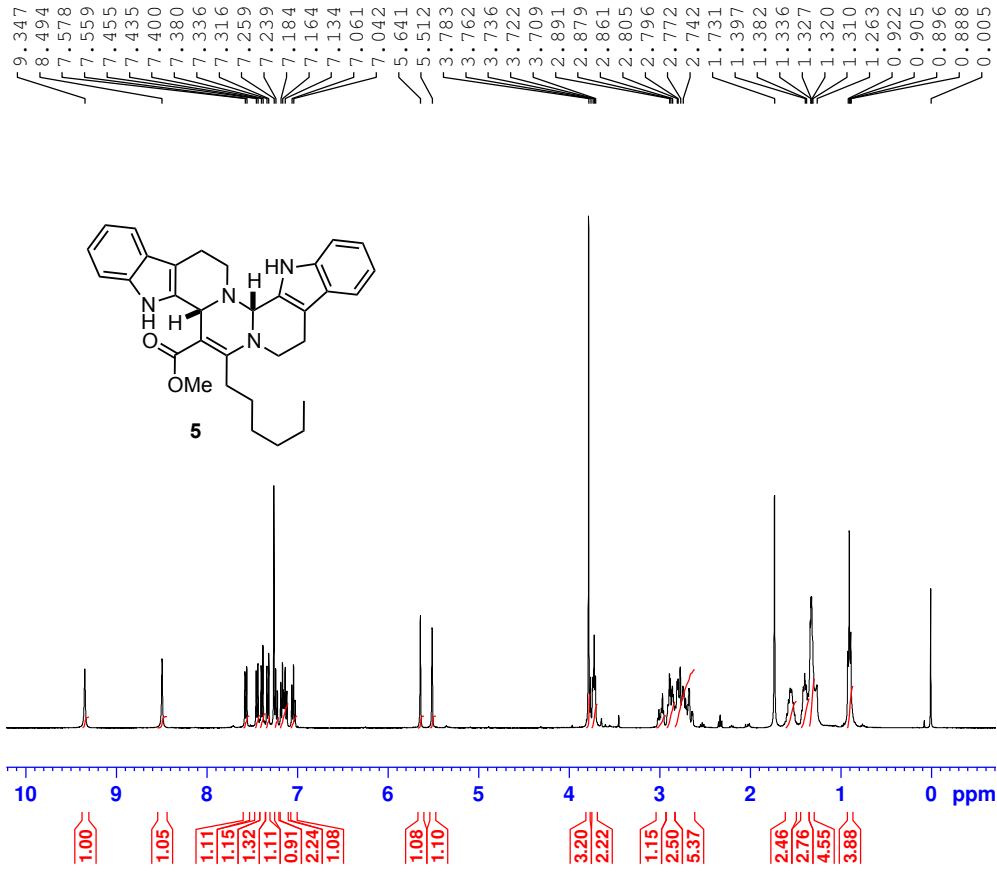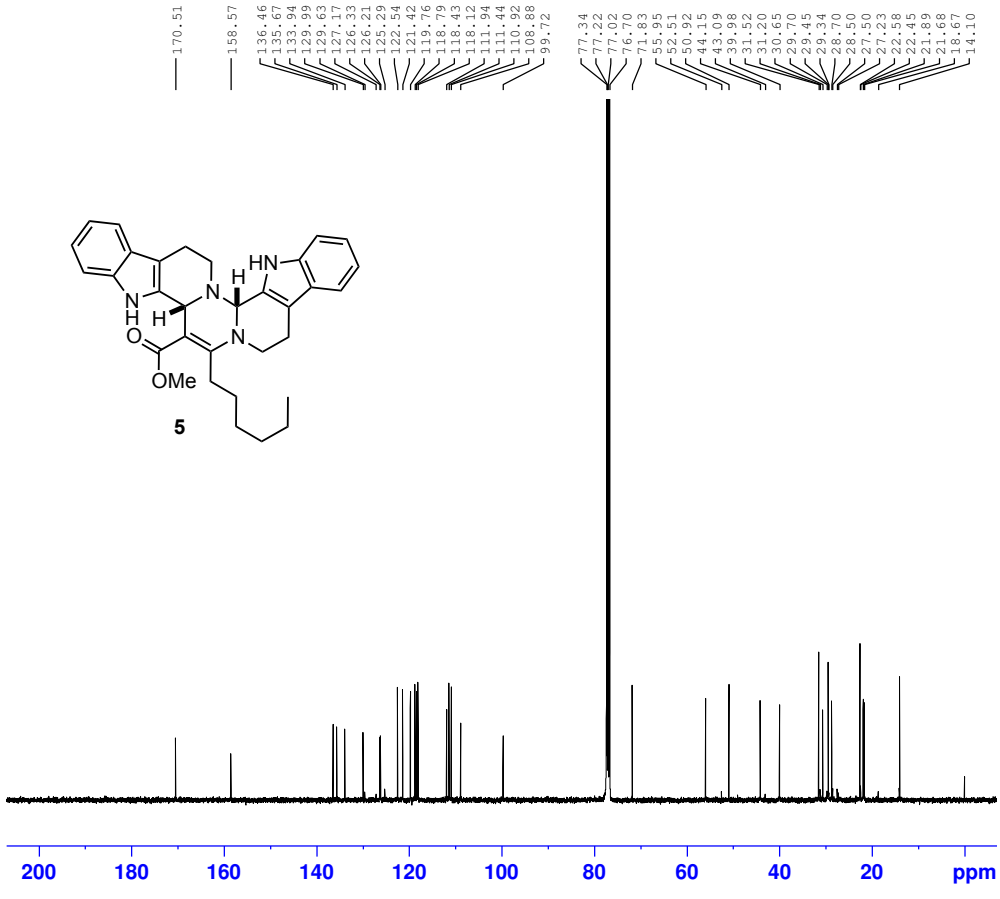

Supplement: c7ob00689f1.pdf [file c7ob00689f1.pdf]
